# Supplementary material
Source: publisher figshare collection journal article supplement (https://acs.figshare.com/ndownloader/files/4535035)
Supplement: Supplementary file 1 [file 4535035]

data_yoon05

_audit_update_record
;
2007-11-21 # Formatted by publCIF
;
#data_New_Global_Publ_Block

_audit_creation_method            
;
manual editing of the CIF file 
created by SHELXTL Ver. 6.10
and processed with modiCIfer-09152005. 
;

# 1. SUBMISSION DETAILS

_publ_contact_author_name
;
Guzei, Ilia A. 
;
_publ_contact_author_address
;
Department of Chemistry
University of Wisconsin-Madison
1101 University Ave
Madison, WI  53706
USA
;

_publ_contact_author_phone    '608-263-4694'
_publ_contact_author_fax      '608-262-0381'
_publ_contact_author_email    iguzei@chem.wisc.edu

_publ_contact_letter
;
Please consider this CIF submission 
for publication in  
;

_publ_requested_journal      
;
;
_publ_requested_category  FA 
# FA 'Full article' 
# FI 'Full submission - inorganic (Acta C)' 
# FO 'Full submission - organic (Acta C)' 
# FM 'Full submission - metal-organic (Acta C)' 
# CI 'CIF-access paper - inorganic (Acta C)' 
# CO 'CIF-access paper - organic (Acta C)' 
# CM 'CIF-access paper - metal-organic (Acta C)' 

# 2. TITLE AND AUTHOR LIST

_publ_section_title
;
Title (type here to add)
;

loop_
_publ_author_name
_publ_author_address
'Guzei, Ilia A.'
;
Department of Chemistry
University of Wisconsin-Madison
1101 University Ave
Madison, WI  53706
USA
;
'Spencer, Lara C.'
;
Department of Chemistry
University of Wisconsin-Madison
1101 University Ave
Madison, WI  53706
USA
;

_publ_section_synopsis
.

_publ_section_abstract
;
(type here to add abstract)
;

_publ_section_comment
;
(type here to add)
;

_publ_section_references
;
Allen, F. H. (2002). <i>Acta Cryst.</i> B<b>58</b>, 380--388.

Bruker-AXS. (2003). <i>SADABS</i> (Version 2.05), <i>SAINT</i> (Version 6.22),
<i>SHELXTL</i> (Version 6.10), and <i>SMART</i> (Version 5.622). Bruker-AXS
Inc., Madison, WI, USA.

Bruno, I. J., Cole, J. C., Edgington, P. R., Kessler, M., Macrae, C. F.,
McCabe, P., Pearson, J. & Taylor, R. (2002). <i>Acta Cryst.</i> B<b>58</b>,
389--397.

Cremer, D. & Pople, J. A. (1975). <i>J. Am. Chem. Soc.</i> <b>97</b>,
1358--1367.

Frisch, M. J., Trucks, G. W., Schlegel, H. B., Scuseria, G. E., Robb, M. A.,
Cheeseman, J. R., Montgomery, J. A. Jr, Vreven, T., Kudin, K. N., Burant, J.
C., Millam, J. M., Iyengar, S. S., Tomasi, J., Barone, V., Mennucci, B., <i>et
al.</i> (2004). Gaussian 03, Revision C.02, Gaussian, Inc., Wallingford, CT,
USA.
;

_publ_section_acknowledgements
;
We thank the National Science Foundation for financial support. 

The manuscript was prepared with the beta test version 1.0.0. of program
<i>publCIF</i> to be released by the IUCr and program <i>modiCIFer</i> to be
released by University of Wisconsin-Madison.
;

_publ_section_figure_captions
;
Figure 1. Molecular structure of (I). The thermal ellipsoids are shown at 50%
probability level.
;

_publ_section_exptl_prep
;

;


_publ_section_exptl_refinement
;
All H-atoms were placed in idealized locations and refined as riding with
appropriate thermal displacement coefficients <i>U</i>~iso~(H) = 1.2 or 1.5
times <i>U</i>~eq~(bearing atom). 

Default effective <i>X</i>---H distances for T = -173.0 C

AFIX m = C1 C2 C3 C4 4[N] 3[N] 15[B] 8[O] 9 9[N] 16 d(<i>X</i>---H) = 1.00 0.99
0.98 0.95 0.88 0.91 1.12 0.84 0.95 0.88 0.95
;

#3. data 
 
_chemical_name_systematic         ?
_chemical_name_common             ?
_chemical_melting_point           ?
_chemical_formula_moiety          'C27 H39 N2, C H Cl3, 0.5(Cl6 Cu2)'
_chemical_formula_sum             'C28 H40 Cl6 Cu N2'
_chemical_formula_weight          680.86
 
loop_
 _atom_type_symbol
 _atom_type_description
 _atom_type_scat_dispersion_real
 _atom_type_scat_dispersion_imag
 _atom_type_scat_source
 'C'  'C'   0.0033   0.0016
 'International Tables Vol C Tables 4.2.6.8 and 6.1.1.4'
 'H'  'H'   0.0000   0.0000
 'International Tables Vol C Tables 4.2.6.8 and 6.1.1.4'
 'N'  'N'   0.0061   0.0033
 'International Tables Vol C Tables 4.2.6.8 and 6.1.1.4'
 'Cl'  'Cl'   0.1484   0.1585
 'International Tables Vol C Tables 4.2.6.8 and 6.1.1.4'
 'Cu'  'Cu'   0.3201   1.2651
 'International Tables Vol C Tables 4.2.6.8 and 6.1.1.4'
 
_symmetry_cell_setting            monoclinic
_symmetry_space_group_name_H-M    'P 1 21/n 1  '
_symmetry_space_group_name_Hall   '-P 2yn      '
_symmetry_int_tables_number       14
 
loop_
 _symmetry_equiv_pos_as_xyz
 'x, y, z'
 '-x+1/2, y+1/2, -z+1/2'
 '-x, -y, -z'
 'x-1/2, -y-1/2, z-1/2'
 
_cell_length_a                    14.130(3)
_cell_length_b                    10.583(2)
_cell_length_c                    21.383(4)
_cell_angle_alpha                 90.00
_cell_angle_beta                  90.471(3)
_cell_angle_gamma                 90.00
_cell_volume                      3197.3(11)
_cell_formula_units_Z             4
_cell_measurement_temperature     100(2)
_cell_measurement_reflns_used     6477
_cell_measurement_theta_min       2.1473
_cell_measurement_theta_max       27.1731
 
_exptl_crystal_description        plate
_exptl_crystal_colour             orange
_exptl_crystal_size_max           0.46
_exptl_crystal_size_mid           0.15
_exptl_crystal_size_min           0.12
_exptl_crystal_density_meas       ?
_exptl_crystal_density_diffrn     1.414
_exptl_crystal_density_method     'not measured'
_exptl_crystal_F_000              1412
_exptl_absorpt_coefficient_mu     1.205
_exptl_absorpt_correction_type    'multi-scan'
_exptl_absorpt_process_details
;
SADABS  (Bruker-AXS, 2003)
;
_exptl_absorpt_correction_T_min   0.6071
_exptl_absorpt_correction_T_max   0.8689
 
_exptl_special_details            ?
 
_diffrn_ambient_temperature       100(2)
_diffrn_radiation_wavelength      0.71073
_diffrn_radiation_type            Mo-K\a
_diffrn_radiation_source          'fine-focus sealed tube'
_diffrn_radiation_monochromator   graphite
_diffrn_measurement_device_type   'Bruker CCD-1000 area detector' 
_diffrn_measurement_method        '0.30\% \w scans'
_diffrn_detector_area_resol_mean  ?
_diffrn_standards_number          0 
_diffrn_standards_interval_count  ? 
_diffrn_standards_interval_time   ? 
_diffrn_standards_decay_%         ?
_diffrn_reflns_number             45693
_diffrn_reflns_av_R_equivalents   0.0778
_diffrn_reflns_av_sigmaI/netI     0.0714
_diffrn_reflns_limit_h_min        -19
_diffrn_reflns_limit_h_max        19
_diffrn_reflns_limit_k_min        -14
_diffrn_reflns_limit_k_max        14
_diffrn_reflns_limit_l_min        -30
_diffrn_reflns_limit_l_max        29
_diffrn_reflns_theta_min          1.73
_diffrn_reflns_theta_max          30.05
_reflns_number_total              9194
_reflns_number_gt                 5830
_reflns_threshold_expression      I>2\s(I) 
 
_computing_data_collection        'SMART Ver. 5.622 (Bruker-AXS, 2003)'
_computing_cell_refinement        'SAINT Ver. 6.22  (Bruker-AXS, 2003)'
_computing_data_reduction         'SAINT Ver. 6.22'
_computing_structure_solution     'SHELXTL Ver. 6.10 (Bruker-AXS, 2003)'
_computing_structure_refinement   'SHELXTL Ver. 6.10'
_computing_molecular_graphics     'SHELXTL Ver. 6.10'
_computing_publication_material   'SHELXTL Ver. 6.10' 
 
_refine_special_details
;
 Refinement of F^2^ against ALL reflections.  The weighted R-factor wR and
 goodness of fit S are based on F^2^, conventional R-factors R are based
 on F, with F set to zero for negative F^2^. The threshold expression of
 F^2^ > 2sigma(F^2^) is used only for calculating R-factors(gt) etc. and is
 not relevant to the choice of reflections for refinement.  R-factors based
 on F^2^ are statistically about twice as large as those based on F, and R-
 factors based on ALL data will be even larger.
;
 
_refine_ls_structure_factor_coef  Fsqd
_refine_ls_matrix_type            full
_refine_ls_weighting_scheme       calc
_refine_ls_weighting_details
 'calc w=1/[\s^2^(Fo^2^)+(0.0613P)^2^+0.7336P] where P=(Fo^2^+2Fc^2^)/3'
_atom_sites_solution_primary      direct
_atom_sites_solution_secondary    difmap
_atom_sites_solution_hydrogens    geom
_refine_ls_hydrogen_treatment     constr
_refine_ls_extinction_method      none
_refine_ls_extinction_coef        ?
_refine_ls_number_reflns          9194
_refine_ls_number_parameters      352
_refine_ls_number_restraints      3
_refine_ls_R_factor_all           0.0976
_refine_ls_R_factor_gt            0.0446
_refine_ls_wR_factor_ref          0.1311
_refine_ls_wR_factor_gt           0.0994
_refine_ls_goodness_of_fit_ref    1.050
_refine_ls_restrained_S_all       1.050
_refine_ls_shift/su_max           0.001
_refine_ls_shift/su_mean          0.000
 
loop_
 _atom_site_label
 _atom_site_type_symbol
 _atom_site_fract_x
 _atom_site_fract_y
 _atom_site_fract_z
 _atom_site_U_iso_or_equiv
 _atom_site_adp_type
 _atom_site_occupancy
 _atom_site_symmetry_multiplicity
 _atom_site_calc_flag
 _atom_site_refinement_flags
 _atom_site_disorder_assembly
 _atom_site_disorder_group
Cu1 Cu 0.06511(2) 0.87731(3) 0.025244(16) 0.01521(10) Uani 1 1 d . . .
Cl1 Cl 0.21251(5) 0.82553(7) 0.00713(3) 0.02280(16) Uani 1 1 d . . .
Cl2 Cl 0.02784(5) 0.71926(7) 0.08810(4) 0.02916(19) Uani 1 1 d . . .
Cl3 Cl -0.08126(5) 0.90516(6) -0.01963(3) 0.02026(16) Uani 1 1 d . . .
N1 N 0.27036(15) 0.4176(2) -0.04015(10) 0.0114(4) Uani 1 1 d . . .
N2 N 0.28018(15) 0.3959(2) 0.06221(10) 0.0119(4) Uani 1 1 d . . .
C1 C 0.29905(18) 0.4063(3) -0.10492(12) 0.0121(5) Uani 1 1 d . . .
C2 C 0.29406(19) 0.2875(3) -0.13274(13) 0.0141(5) Uani 1 1 d . . .
C3 C 0.3212(2) 0.2796(3) -0.19537(13) 0.0176(6) Uani 1 1 d . . .
H3 H 0.3186 0.2004 -0.2163 0.021 Uiso 1 1 calc R . .
C4 C 0.3518(2) 0.3852(3) -0.22717(13) 0.0176(6) Uani 1 1 d . . .
H4 H 0.3704 0.3777 -0.2696 0.021 Uiso 1 1 calc R . .
C5 C 0.3557(2) 0.5019(3) -0.19819(13) 0.0158(6) Uani 1 1 d . . .
H5 H 0.3769 0.5736 -0.2209 0.019 Uiso 1 1 calc R . .
C6 C 0.32884(18) 0.5152(2) -0.13606(13) 0.0126(5) Uani 1 1 d . . .
C7 C 0.2643(2) 0.1699(3) -0.09710(13) 0.0174(6) Uani 1 1 d . . .
H7 H 0.2294 0.1977 -0.0590 0.021 Uiso 1 1 calc R . .
C8 C 0.3528(2) 0.0971(3) -0.07536(15) 0.0263(7) Uani 1 1 d . . .
H8A H 0.3876 0.0669 -0.1119 0.039 Uiso 1 1 calc R . .
H8B H 0.3337 0.0248 -0.0498 0.039 Uiso 1 1 calc R . .
H8C H 0.3936 0.1531 -0.0505 0.039 Uiso 1 1 calc R . .
C9 C 0.1987(2) 0.0836(3) -0.13522(14) 0.0238(7) Uani 1 1 d . . .
H9A H 0.1422 0.1310 -0.1481 0.036 Uiso 1 1 calc R . .
H9B H 0.1799 0.0113 -0.1096 0.036 Uiso 1 1 calc R . .
H9C H 0.2320 0.0534 -0.1724 0.036 Uiso 1 1 calc R . .
C10 C 0.33510(19) 0.6416(3) -0.10257(13) 0.0152(6) Uani 1 1 d . . .
H10 H 0.2815 0.6461 -0.0724 0.018 Uiso 1 1 calc R . .
C11 C 0.3264(2) 0.7549(3) -0.14701(14) 0.0233(7) Uani 1 1 d . . .
H11A H 0.3839 0.7616 -0.1722 0.035 Uiso 1 1 calc R . .
H11B H 0.3183 0.8325 -0.1226 0.035 Uiso 1 1 calc R . .
H11C H 0.2715 0.7432 -0.1747 0.035 Uiso 1 1 calc R . .
C12 C 0.4278(2) 0.6527(3) -0.06498(14) 0.0203(6) Uani 1 1 d . . .
H12A H 0.4314 0.5842 -0.0342 0.030 Uiso 1 1 calc R . .
H12B H 0.4296 0.7343 -0.0433 0.030 Uiso 1 1 calc R . .
H12C H 0.4817 0.6468 -0.0934 0.030 Uiso 1 1 calc R . .
C13 C 0.17298(18) 0.4471(3) -0.01929(13) 0.0165(6) Uani 1 1 d . . .
H13A H 0.1263 0.3886 -0.0384 0.020 Uiso 1 1 calc R . .
H13B H 0.1554 0.5351 -0.0299 0.020 Uiso 1 1 calc R . .
C14 C 0.17927(18) 0.4282(3) 0.05191(13) 0.0149(5) Uani 1 1 d . . .
H14A H 0.1620 0.5065 0.0744 0.018 Uiso 1 1 calc R . .
H14B H 0.1374 0.3587 0.0657 0.018 Uiso 1 1 calc R . .
C15 C 0.32370(18) 0.3904(2) 0.00858(12) 0.0114(5) Uani 1 1 d . . .
H15 H 0.3886 0.3685 0.0051 0.014 Uiso 1 1 calc R . .
C16 C 0.32452(18) 0.3818(3) 0.12297(12) 0.0126(5) Uani 1 1 d . . .
C17 C 0.33554(19) 0.2604(3) 0.14758(12) 0.0139(5) Uani 1 1 d . . .
C18 C 0.38023(19) 0.2513(3) 0.20595(13) 0.0160(6) Uani 1 1 d . . .
H18 H 0.3899 0.1703 0.2240 0.019 Uiso 1 1 calc R . .
C19 C 0.4107(2) 0.3575(3) 0.23799(13) 0.0176(6) Uani 1 1 d . . .
H19 H 0.4399 0.3491 0.2779 0.021 Uiso 1 1 calc R . .
C20 C 0.39843(19) 0.4761(3) 0.21175(13) 0.0162(6) Uani 1 1 d . . .
H20 H 0.4200 0.5485 0.2339 0.019 Uiso 1 1 calc R . .
C21 C 0.35509(19) 0.4914(2) 0.15354(12) 0.0126(5) Uani 1 1 d . . .
C22 C 0.3022(2) 0.1420(3) 0.11467(13) 0.0166(6) Uani 1 1 d . . .
H22 H 0.2717 0.1678 0.0743 0.020 Uiso 1 1 calc R . .
C23 C 0.3851(2) 0.0544(3) 0.09929(15) 0.0240(7) Uani 1 1 d . . .
H23A H 0.4310 0.1001 0.0737 0.036 Uiso 1 1 calc R . .
H23B H 0.3616 -0.0192 0.0761 0.036 Uiso 1 1 calc R . .
H23C H 0.4157 0.0264 0.1382 0.036 Uiso 1 1 calc R . .
C24 C 0.2280(2) 0.0732(3) 0.15351(14) 0.0208(6) Uani 1 1 d . . .
H24A H 0.2556 0.0497 0.1941 0.031 Uiso 1 1 calc R . .
H24B H 0.2073 -0.0031 0.1314 0.031 Uiso 1 1 calc R . .
H24C H 0.1736 0.1290 0.1600 0.031 Uiso 1 1 calc R . .
C25 C 0.34269(19) 0.6226(2) 0.12603(13) 0.0150(5) Uani 1 1 d . . .
H25 H 0.3122 0.6132 0.0839 0.018 Uiso 1 1 calc R . .
C26 C 0.4386(2) 0.6876(3) 0.11705(15) 0.0229(7) Uani 1 1 d . . .
H26A H 0.4677 0.7041 0.1580 0.034 Uiso 1 1 calc R . .
H26B H 0.4293 0.7676 0.0948 0.034 Uiso 1 1 calc R . .
H26C H 0.4801 0.6325 0.0926 0.034 Uiso 1 1 calc R . .
C27 C 0.2773(2) 0.7030(3) 0.16646(14) 0.0202(6) Uani 1 1 d . . .
H27A H 0.2149 0.6629 0.1686 0.030 Uiso 1 1 calc R . .
H27B H 0.2710 0.7874 0.1480 0.030 Uiso 1 1 calc R . .
H27C H 0.3042 0.7102 0.2087 0.030 Uiso 1 1 calc R . .
C28 C 0.0114(2) 0.5449(3) -0.17562(14) 0.0213(6) Uani 1 1 d D . .
H28 H -0.0116 0.4818 -0.1445 0.032 Uiso 0.92(2) 1 calc PR A 1
H28A H -0.0316 0.4618 -0.1644 0.032 Uiso 0.08(2) 1 d PR A 2
Cl4 Cl 0.0953(2) 0.4694(2) -0.2227(2) 0.0326(5) Uani 0.92(2) 1 d PD A 1
Cl5 Cl 0.0644(3) 0.6702(3) -0.13383(12) 0.0298(4) Uani 0.92(2) 1 d PD A 1
Cl6 Cl -0.0874(3) 0.59874(18) -0.2188(2) 0.0323(6) Uani 0.92(2) 1 d PD A 1
Cl4A Cl 0.080(2) 0.478(3) -0.2350(13) 0.0326(5) Uani 0.08(2) 1 d PD A 2
Cl5A Cl 0.047(3) 0.6853(19) -0.1381(16) 0.0298(4) Uani 0.08(2) 1 d PD A 2
Cl6A Cl -0.069(2) 0.603(2) -0.2324(14) 0.0323(6) Uani 0.08(2) 1 d PD A 2
 
loop_
 _atom_site_aniso_label
 _atom_site_aniso_U_11
 _atom_site_aniso_U_22
 _atom_site_aniso_U_33
 _atom_site_aniso_U_23
 _atom_site_aniso_U_13
 _atom_site_aniso_U_12
Cu1 0.01508(17) 0.01144(17) 0.01911(19) 0.00212(13) -0.00106(13) -0.00003(13)
Cl1 0.0195(3) 0.0217(4) 0.0273(4) 0.0007(3) 0.0041(3) 0.0059(3)
Cl2 0.0238(4) 0.0232(4) 0.0404(5) 0.0178(3) -0.0063(3) -0.0057(3)
Cl3 0.0178(3) 0.0131(3) 0.0298(4) 0.0029(3) -0.0056(3) -0.0019(3)
N1 0.0131(11) 0.0092(10) 0.0119(11) -0.0009(8) -0.0010(8) 0.0007(8)
N2 0.0111(10) 0.0109(11) 0.0136(11) 0.0012(8) 0.0005(8) 0.0018(8)
C1 0.0122(12) 0.0145(13) 0.0095(13) 0.0009(10) -0.0011(10) 0.0011(10)
C2 0.0146(13) 0.0112(12) 0.0164(14) 0.0007(10) -0.0015(10) -0.0005(10)
C3 0.0231(15) 0.0142(13) 0.0155(14) -0.0019(11) -0.0006(11) 0.0011(11)
C4 0.0216(14) 0.0223(15) 0.0088(13) -0.0014(11) -0.0004(11) 0.0014(12)
C5 0.0180(14) 0.0128(13) 0.0166(14) 0.0026(10) -0.0004(11) 0.0001(11)
C6 0.0109(12) 0.0106(12) 0.0162(14) 0.0005(10) -0.0021(10) 0.0019(10)
C7 0.0261(15) 0.0127(13) 0.0134(14) -0.0020(11) -0.0002(11) -0.0031(12)
C8 0.0366(18) 0.0157(15) 0.0265(17) 0.0053(12) -0.0051(14) -0.0051(13)
C9 0.0284(16) 0.0199(15) 0.0230(16) -0.0010(12) 0.0013(13) -0.0067(13)
C10 0.0160(13) 0.0132(13) 0.0163(14) 0.0005(10) 0.0022(11) -0.0007(10)
C11 0.0328(17) 0.0143(14) 0.0229(16) -0.0001(12) -0.0016(13) 0.0023(13)
C12 0.0197(14) 0.0165(14) 0.0247(16) -0.0028(12) -0.0018(12) -0.0038(12)
C13 0.0102(12) 0.0225(15) 0.0170(14) 0.0002(11) -0.0007(10) 0.0024(11)
C14 0.0109(12) 0.0185(14) 0.0152(14) 0.0007(11) -0.0001(10) 0.0017(11)
C15 0.0126(12) 0.0089(12) 0.0126(13) -0.0008(10) -0.0009(10) -0.0014(10)
C16 0.0105(12) 0.0176(13) 0.0097(12) 0.0025(10) 0.0020(9) 0.0010(10)
C17 0.0162(13) 0.0125(13) 0.0132(13) 0.0014(10) 0.0030(10) 0.0020(10)
C18 0.0198(14) 0.0153(14) 0.0129(13) 0.0035(11) 0.0024(11) 0.0008(11)
C19 0.0207(14) 0.0202(15) 0.0119(13) 0.0026(11) -0.0024(11) 0.0005(12)
C20 0.0173(13) 0.0171(14) 0.0143(14) -0.0024(11) 0.0000(11) -0.0025(11)
C21 0.0129(13) 0.0138(13) 0.0112(13) 0.0005(10) 0.0033(10) 0.0023(10)
C22 0.0224(14) 0.0121(13) 0.0152(14) 0.0019(10) -0.0024(11) -0.0011(11)
C23 0.0306(17) 0.0170(15) 0.0245(17) -0.0034(12) 0.0009(13) 0.0017(13)
C24 0.0247(15) 0.0158(14) 0.0220(16) 0.0009(12) -0.0007(12) -0.0034(12)
C25 0.0166(13) 0.0120(13) 0.0162(14) -0.0007(10) -0.0005(10) 0.0002(11)
C26 0.0232(15) 0.0162(15) 0.0294(17) 0.0068(12) 0.0024(13) -0.0016(12)
C27 0.0225(15) 0.0162(14) 0.0218(16) -0.0027(12) -0.0003(12) 0.0042(12)
C28 0.0233(15) 0.0191(15) 0.0216(16) 0.0019(12) 0.0015(12) 0.0014(12)
Cl4 0.0299(8) 0.0275(6) 0.0405(10) 0.0010(6) 0.0119(8) 0.0044(5)
Cl5 0.0355(10) 0.0254(6) 0.0283(6) 0.0018(5) -0.0092(5) -0.0018(6)
Cl6 0.0314(8) 0.0306(5) 0.0346(11) -0.0031(6) -0.0110(9) 0.0088(6)
Cl4A 0.0299(8) 0.0275(6) 0.0405(10) 0.0010(6) 0.0119(8) 0.0044(5)
Cl5A 0.0355(10) 0.0254(6) 0.0283(6) 0.0018(5) -0.0092(5) -0.0018(6)
Cl6A 0.0314(8) 0.0306(5) 0.0346(11) -0.0031(6) -0.0110(9) 0.0088(6)
 
_geom_special_details
;
 All esds (except the esd in the dihedral angle between two l.s. planes)
 are estimated using the full covariance matrix.  The cell esds are taken
 into account individually in the estimation of esds in distances, angles
 and torsion angles; correlations between esds in cell parameters are only
 used when they are defined by crystal symmetry.  An approximate (isotropic)
 treatment of cell esds is used for estimating esds involving l.s. planes.
;
 
loop_
 _geom_bond_atom_site_label_1
 _geom_bond_atom_site_label_2
 _geom_bond_distance
 _geom_bond_site_symmetry_2
 _geom_bond_publ_flag
Cu1 Cl1 2.1913(9) . yes
Cu1 Cl2 2.2120(8) . yes
Cu1 Cl3 2.2918(8) . yes
Cu1 Cl3 2.3165(9) 3_575 yes
Cl3 Cu1 2.3165(9) 3_575 yes
N1 C15 1.313(3) . ?
N1 C1 1.451(3) . ?
N1 C13 1.483(3) . ?
N2 C15 1.307(3) . ?
N2 C16 1.445(3) . ?
N2 C14 1.481(3) . ?
C1 C2 1.393(4) . ?
C1 C6 1.397(4) . ?
C2 C3 1.399(4) . ?
C2 C7 1.520(4) . ?
C3 C4 1.380(4) . ?
C3 H3 0.9500 . ?
C4 C5 1.382(4) . ?
C4 H4 0.9500 . ?
C5 C6 1.392(4) . ?
C5 H5 0.9500 . ?
C6 C10 1.519(4) . ?
C7 C9 1.531(4) . ?
C7 C8 1.538(4) . ?
C7 H7 1.0000 . ?
C8 H8A 0.9800 . ?
C8 H8B 0.9800 . ?
C8 H8C 0.9800 . ?
C9 H9A 0.9800 . ?
C9 H9B 0.9800 . ?
C9 H9C 0.9800 . ?
C10 C11 1.535(4) . ?
C10 C12 1.536(4) . ?
C10 H10 1.0000 . ?
C11 H11A 0.9800 . ?
C11 H11B 0.9800 . ?
C11 H11C 0.9800 . ?
C12 H12A 0.9800 . ?
C12 H12B 0.9800 . ?
C12 H12C 0.9800 . ?
C13 C14 1.537(4) . ?
C13 H13A 0.9900 . ?
C13 H13B 0.9900 . ?
C14 H14A 0.9900 . ?
C14 H14B 0.9900 . ?
C15 H15 0.9500 . ?
C16 C17 1.397(4) . ?
C16 C21 1.398(4) . ?
C17 C18 1.398(4) . ?
C17 C22 1.511(4) . ?
C18 C19 1.383(4) . ?
C18 H18 0.9500 . ?
C19 C20 1.386(4) . ?
C19 H19 0.9500 . ?
C20 C21 1.392(4) . ?
C20 H20 0.9500 . ?
C21 C25 1.517(4) . ?
C22 C24 1.527(4) . ?
C22 C23 1.530(4) . ?
C22 H22 1.0000 . ?
C23 H23A 0.9800 . ?
C23 H23B 0.9800 . ?
C23 H23C 0.9800 . ?
C24 H24A 0.9800 . ?
C24 H24B 0.9800 . ?
C24 H24C 0.9800 . ?
C25 C27 1.529(4) . ?
C25 C26 1.533(4) . ?
C25 H25 1.0000 . ?
C26 H26A 0.9800 . ?
C26 H26B 0.9800 . ?
C26 H26C 0.9800 . ?
C27 H27A 0.9800 . ?
C27 H27B 0.9800 . ?
C27 H27C 0.9800 . ?
C28 Cl5A 1.762(3) . ?
C28 Cl4 1.754(3) . ?
C28 Cl4A 1.755(3) . ?
C28 Cl5 1.762(3) . ?
C28 Cl6A 1.763(3) . ?
C28 Cl6 1.763(3) . ?
C28 H28 1.0000 . ?
C28 H28A 1.0968 . ?
Cl5A Cl6A 2.73(3) . ?
 
loop_
 _geom_angle_atom_site_label_1
 _geom_angle_atom_site_label_2
 _geom_angle_atom_site_label_3
 _geom_angle
 _geom_angle_site_symmetry_1
 _geom_angle_site_symmetry_3
 _geom_angle_publ_flag
Cl1 Cu1 Cl2 98.61(3) . . yes
Cl1 Cu1 Cl3 144.49(3) . . yes
Cl2 Cu1 Cl3 97.65(3) . . yes
Cl1 Cu1 Cl3 98.34(3) . 3_575 yes
Cl2 Cu1 Cl3 143.80(3) . 3_575 yes
Cl3 Cu1 Cl3 86.53(3) . 3_575 yes
Cu1 Cl3 Cu1 93.47(3) . 3_575 ?
C15 N1 C1 125.2(2) . . ?
C15 N1 C13 109.6(2) . . ?
C1 N1 C13 124.9(2) . . ?
C15 N2 C16 125.5(2) . . ?
C15 N2 C14 109.8(2) . . ?
C16 N2 C14 124.5(2) . . ?
C2 C1 C6 123.7(2) . . ?
C2 C1 N1 117.9(2) . . ?
C6 C1 N1 118.3(2) . . ?
C1 C2 C3 116.7(2) . . ?
C1 C2 C7 122.6(2) . . ?
C3 C2 C7 120.7(2) . . ?
C4 C3 C2 120.9(3) . . ?
C4 C3 H3 119.6 . . ?
C2 C3 H3 119.6 . . ?
C3 C4 C5 121.0(3) . . ?
C3 C4 H4 119.5 . . ?
C5 C4 H4 119.5 . . ?
C4 C5 C6 120.5(3) . . ?
C4 C5 H5 119.8 . . ?
C6 C5 H5 119.8 . . ?
C5 C6 C1 117.2(2) . . ?
C5 C6 C10 121.5(2) . . ?
C1 C6 C10 121.2(2) . . ?
C2 C7 C9 112.9(2) . . ?
C2 C7 C8 109.5(2) . . ?
C9 C7 C8 110.5(2) . . ?
C2 C7 H7 107.9 . . ?
C9 C7 H7 107.9 . . ?
C8 C7 H7 107.9 . . ?
C7 C8 H8A 109.5 . . ?
C7 C8 H8B 109.5 . . ?
H8A C8 H8B 109.5 . . ?
C7 C8 H8C 109.5 . . ?
H8A C8 H8C 109.5 . . ?
H8B C8 H8C 109.5 . . ?
C7 C9 H9A 109.5 . . ?
C7 C9 H9B 109.5 . . ?
H9A C9 H9B 109.5 . . ?
C7 C9 H9C 109.5 . . ?
H9A C9 H9C 109.5 . . ?
H9B C9 H9C 109.5 . . ?
C6 C10 C11 113.1(2) . . ?
C6 C10 C12 111.1(2) . . ?
C11 C10 C12 109.1(2) . . ?
C6 C10 H10 107.8 . . ?
C11 C10 H10 107.8 . . ?
C12 C10 H10 107.8 . . ?
C10 C11 H11A 109.5 . . ?
C10 C11 H11B 109.5 . . ?
H11A C11 H11B 109.5 . . ?
C10 C11 H11C 109.5 . . ?
H11A C11 H11C 109.5 . . ?
H11B C11 H11C 109.5 . . ?
C10 C12 H12A 109.5 . . ?
C10 C12 H12B 109.5 . . ?
H12A C12 H12B 109.5 . . ?
C10 C12 H12C 109.5 . . ?
H12A C12 H12C 109.5 . . ?
H12B C12 H12C 109.5 . . ?
N1 C13 C14 103.0(2) . . ?
N1 C13 H13A 111.2 . . ?
C14 C13 H13A 111.2 . . ?
N1 C13 H13B 111.2 . . ?
C14 C13 H13B 111.2 . . ?
H13A C13 H13B 109.1 . . ?
N2 C14 C13 103.0(2) . . ?
N2 C14 H14A 111.2 . . ?
C13 C14 H14A 111.2 . . ?
N2 C14 H14B 111.2 . . ?
C13 C14 H14B 111.2 . . ?
H14A C14 H14B 109.1 . . ?
N2 C15 N1 114.5(2) . . ?
N2 C15 H15 122.7 . . ?
N1 C15 H15 122.7 . . ?
C17 C16 C21 123.6(2) . . ?
C17 C16 N2 118.7(2) . . ?
C21 C16 N2 117.7(2) . . ?
C16 C17 C18 116.6(2) . . ?
C16 C17 C22 123.7(2) . . ?
C18 C17 C22 119.7(2) . . ?
C19 C18 C17 121.5(3) . . ?
C19 C18 H18 119.2 . . ?
C17 C18 H18 119.2 . . ?
C18 C19 C20 119.9(3) . . ?
C18 C19 H19 120.0 . . ?
C20 C19 H19 120.0 . . ?
C19 C20 C21 121.3(3) . . ?
C19 C20 H20 119.4 . . ?
C21 C20 H20 119.4 . . ?
C20 C21 C16 117.0(2) . . ?
C20 C21 C25 120.1(2) . . ?
C16 C21 C25 122.9(2) . . ?
C17 C22 C24 110.7(2) . . ?
C17 C22 C23 111.5(2) . . ?
C24 C22 C23 111.0(2) . . ?
C17 C22 H22 107.8 . . ?
C24 C22 H22 107.8 . . ?
C23 C22 H22 107.8 . . ?
C22 C23 H23A 109.5 . . ?
C22 C23 H23B 109.5 . . ?
H23A C23 H23B 109.5 . . ?
C22 C23 H23C 109.5 . . ?
H23A C23 H23C 109.5 . . ?
H23B C23 H23C 109.5 . . ?
C22 C24 H24A 109.5 . . ?
C22 C24 H24B 109.5 . . ?
H24A C24 H24B 109.5 . . ?
C22 C24 H24C 109.5 . . ?
H24A C24 H24C 109.5 . . ?
H24B C24 H24C 109.5 . . ?
C21 C25 C27 111.0(2) . . ?
C21 C25 C26 111.1(2) . . ?
C27 C25 C26 111.1(2) . . ?
C21 C25 H25 107.8 . . ?
C27 C25 H25 107.8 . . ?
C26 C25 H25 107.8 . . ?
C25 C26 H26A 109.5 . . ?
C25 C26 H26B 109.5 . . ?
H26A C26 H26B 109.5 . . ?
C25 C26 H26C 109.5 . . ?
H26A C26 H26C 109.5 . . ?
H26B C26 H26C 109.5 . . ?
C25 C27 H27A 109.5 . . ?
C25 C27 H27B 109.5 . . ?
H27A C27 H27B 109.5 . . ?
C25 C27 H27C 109.5 . . ?
H27A C27 H27C 109.5 . . ?
H27B C27 H27C 109.5 . . ?
Cl5A C28 Cl4 116.8(13) . . ?
Cl5A C28 Cl4A 120.5(17) . . ?
Cl4 C28 Cl4A 11.4(12) . . ?
Cl5A C28 Cl5 9.8(11) . . ?
Cl4 C28 Cl5 110.4(3) . . ?
Cl4A C28 Cl5 115.6(12) . . ?
Cl5A C28 Cl6A 101.7(15) . . ?
Cl4 C28 Cl6A 101.3(15) . . ?
Cl4A C28 Cl6A 90(2) . . ?
Cl5 C28 Cl6A 110.8(9) . . ?
Cl5A C28 Cl6 101.0(12) . . ?
Cl4 C28 Cl6 112.5(4) . . ?
Cl4A C28 Cl6 101.2(15) . . ?
Cl5 C28 Cl6 110.7(2) . . ?
Cl6A C28 Cl6 13.0(13) . . ?
Cl5A C28 H28 110.7 . . ?
Cl4 C28 H28 107.7 . . ?
Cl4A C28 H28 113.6 . . ?
Cl5 C28 H28 107.7 . . ?
Cl6A C28 H28 118.8 . . ?
Cl6 C28 H28 107.7 . . ?
Cl5A C28 H28A 137.3 . . ?
Cl4 C28 H28A 98.0 . . ?
Cl4A C28 H28A 98.5 . . ?
Cl5 C28 H28A 136.6 . . ?
Cl6A C28 H28A 94.3 . . ?
Cl6 C28 H28A 86.3 . . ?
H28 C28 H28A 30.1 . . ?
C28 Cl5A Cl6A 39.2(7) . . ?
C28 Cl6A Cl5A 39.2(7) . . ?
 
loop_
 _geom_torsion_atom_site_label_1
 _geom_torsion_atom_site_label_2
 _geom_torsion_atom_site_label_3
 _geom_torsion_atom_site_label_4
 _geom_torsion
 _geom_torsion_site_symmetry_1
 _geom_torsion_site_symmetry_2
 _geom_torsion_site_symmetry_3
 _geom_torsion_site_symmetry_4
 _geom_torsion_publ_flag
Cl1 Cu1 Cl3 Cu1 -99.51(5) . . . 3_575 ?
Cl2 Cu1 Cl3 Cu1 143.86(3) . . . 3_575 ?
Cl3 Cu1 Cl3 Cu1 0.0 3_575 . . 3_575 ?
C15 N1 C1 C2 81.9(3) . . . . ?
C13 N1 C1 C2 -90.5(3) . . . . ?
C15 N1 C1 C6 -99.0(3) . . . . ?
C13 N1 C1 C6 88.6(3) . . . . ?
C6 C1 C2 C3 0.3(4) . . . . ?
N1 C1 C2 C3 179.4(2) . . . . ?
C6 C1 C2 C7 178.0(2) . . . . ?
N1 C1 C2 C7 -2.9(4) . . . . ?
C1 C2 C3 C4 0.3(4) . . . . ?
C7 C2 C3 C4 -177.5(3) . . . . ?
C2 C3 C4 C5 -0.5(4) . . . . ?
C3 C4 C5 C6 0.0(4) . . . . ?
C4 C5 C6 C1 0.5(4) . . . . ?
C4 C5 C6 C10 178.3(2) . . . . ?
C2 C1 C6 C5 -0.7(4) . . . . ?
N1 C1 C6 C5 -179.8(2) . . . . ?
C2 C1 C6 C10 -178.4(2) . . . . ?
N1 C1 C6 C10 2.5(4) . . . . ?
C1 C2 C7 C9 138.8(3) . . . . ?
C3 C2 C7 C9 -43.5(4) . . . . ?
C1 C2 C7 C8 -97.6(3) . . . . ?
C3 C2 C7 C8 80.0(3) . . . . ?
C5 C6 C10 C11 27.3(4) . . . . ?
C1 C6 C10 C11 -155.1(2) . . . . ?
C5 C6 C10 C12 -95.8(3) . . . . ?
C1 C6 C10 C12 81.8(3) . . . . ?
C15 N1 C13 C14 -1.4(3) . . . . ?
C1 N1 C13 C14 172.0(2) . . . . ?
C15 N2 C14 C13 -2.6(3) . . . . ?
C16 N2 C14 C13 173.3(2) . . . . ?
N1 C13 C14 N2 2.3(3) . . . . ?
C16 N2 C15 N1 -174.0(2) . . . . ?
C14 N2 C15 N1 1.9(3) . . . . ?
C1 N1 C15 N2 -173.6(2) . . . . ?
C13 N1 C15 N2 -0.2(3) . . . . ?
C15 N2 C16 C17 -86.7(3) . . . . ?
C14 N2 C16 C17 98.0(3) . . . . ?
C15 N2 C16 C21 92.6(3) . . . . ?
C14 N2 C16 C21 -82.8(3) . . . . ?
C21 C16 C17 C18 -0.3(4) . . . . ?
N2 C16 C17 C18 178.9(2) . . . . ?
C21 C16 C17 C22 179.8(3) . . . . ?
N2 C16 C17 C22 -1.0(4) . . . . ?
C16 C17 C18 C19 0.9(4) . . . . ?
C22 C17 C18 C19 -179.2(3) . . . . ?
C17 C18 C19 C20 -1.0(4) . . . . ?
C18 C19 C20 C21 0.5(4) . . . . ?
C19 C20 C21 C16 0.1(4) . . . . ?
C19 C20 C21 C25 180.0(2) . . . . ?
C17 C16 C21 C20 -0.2(4) . . . . ?
N2 C16 C21 C20 -179.4(2) . . . . ?
C17 C16 C21 C25 179.9(2) . . . . ?
N2 C16 C21 C25 0.7(4) . . . . ?
C16 C17 C22 C24 -118.5(3) . . . . ?
C18 C17 C22 C24 61.6(3) . . . . ?
C16 C17 C22 C23 117.4(3) . . . . ?
C18 C17 C22 C23 -62.6(3) . . . . ?
C20 C21 C25 C27 -63.7(3) . . . . ?
C16 C21 C25 C27 116.2(3) . . . . ?
C20 C21 C25 C26 60.4(3) . . . . ?
C16 C21 C25 C26 -119.7(3) . . . . ?
Cl4 C28 Cl5A Cl6A 109(2) . . . . ?
Cl4A C28 Cl5A Cl6A 97(3) . . . . ?
Cl5 C28 Cl5A Cl6A 159(8) . . . . ?
Cl6 C28 Cl5A Cl6A -13.2(13) . . . . ?
Cl4 C28 Cl6A Cl5A -120.8(13) . . . . ?
Cl4A C28 Cl6A Cl5A -121.2(16) . . . . ?
Cl5 C28 Cl6A Cl5A -3.7(14) . . . . ?
Cl6 C28 Cl6A Cl5A 89(4) . . . . ?
 
_diffrn_measured_fraction_theta_max    0.984
_diffrn_reflns_theta_full              30.05
_diffrn_measured_fraction_theta_full   0.984
_refine_diff_density_max    0.615
_refine_diff_density_min   -0.458
_refine_diff_density_rms    0.124

 
# File processed with modiCIFer (v.3-27-2007). I.A.Guzei, UW-Madison.
